# Supplementary material for: Effect of changing NO x lifetime on the seasonality and long-term trends of satellite-observed tropospheric NO 2 columns over China
Source: Copernicus journal article supplement (doi:10.5194/acp-20-1483-2020), 2020-02-07
Supplement: Supplementary file 1 [file acp-20-1483-2020-supplement.pdf]

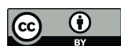

*Supplement of*

## **Effect of changing $\text{NO}_x$ lifetime on the seasonality and long-term trends of satellite-observed tropospheric $\text{NO}_2$ columns over China**

**Viral Shah et al.**

*Correspondence to:* Viral Shah ([vshah@seas.harvard.edu](mailto:vshah@seas.harvard.edu))

The copyright of individual parts of the supplement might differ from the CC BY 4.0 License.

# MEIC NO<sub>x</sub> emissions trends over China

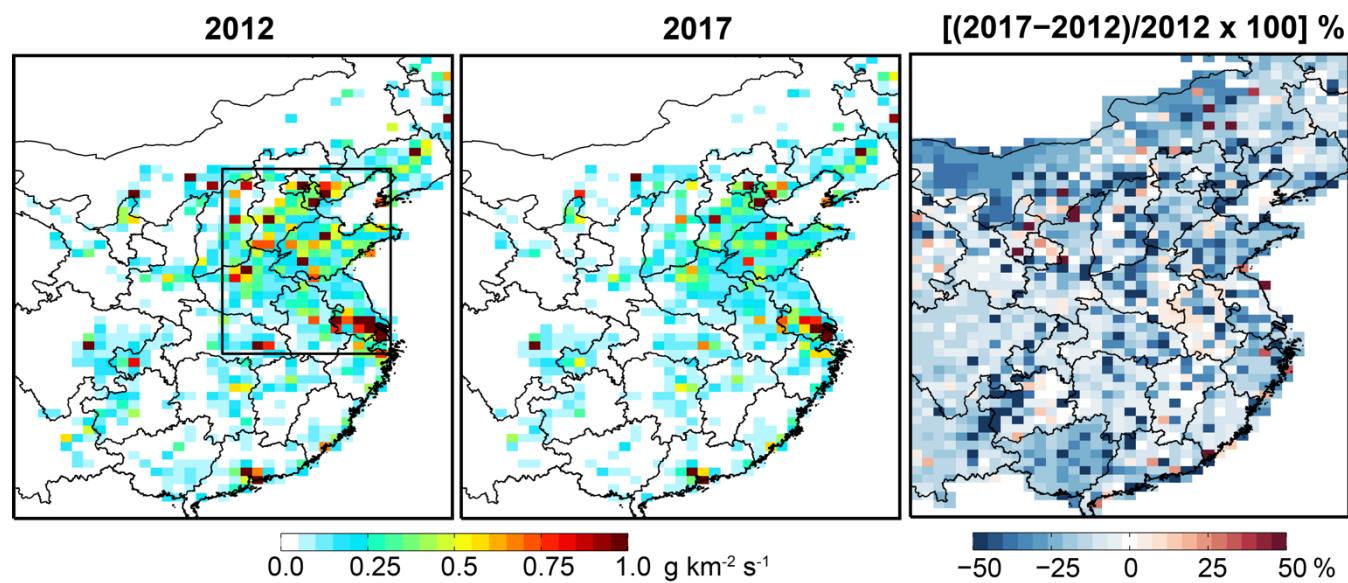

Figure S1: Trends in anthropogenic NO<sub>x</sub> emissions over China. Left panels show the MEIC NO<sub>x</sub> emissions for 2012 and 2017 and the right panels show their percentage change. The rectangle in the left panel delineates central-eastern China as defined here.

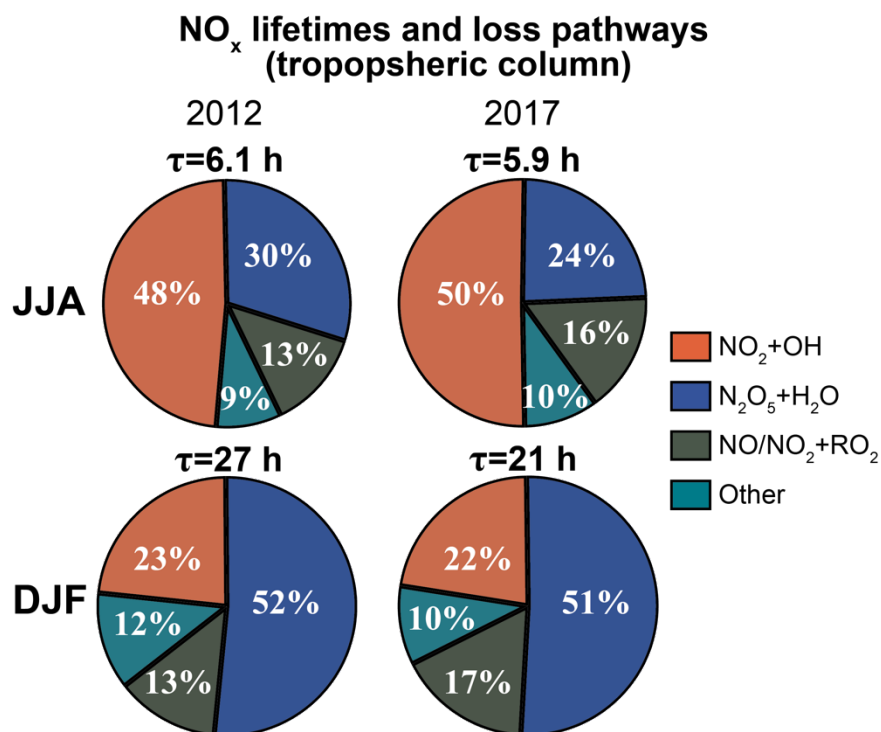

**Figure S2: NO<sub>x</sub> lifetime ( $\tau$ ) and loss pathways for the tropospheric column over central-eastern China.** The lifetimes are the GEOS-Chem averages for the tropospheric column weighted by the OMI averaging kernel over the domain delineated in Figure 1, and the pie charts show the relative contributions of the different NO<sub>x</sub> sinks. For the lifetime calculation we define NO<sub>x</sub> as NO+NO<sub>2</sub>+NO<sub>3</sub>+2N<sub>2</sub>O<sub>5</sub>+HONO+HNO<sub>4</sub>+ClNO<sub>2</sub>. Values are given for summer (JJA) and winter (DJF) of 2012 and 2017. The sink from NO/NO<sub>2</sub>+RO<sub>2</sub> is the net flux, accounting for partial recycling of the organic nitrates, and includes the contributions from peroxyacyl nitrates (PANs). The ‘Other’ sinks include NO<sub>3</sub>+VOC reactions, NO<sub>2</sub> and NO<sub>3</sub> hydrolysis in aerosols, and NO<sub>x</sub> deposition.

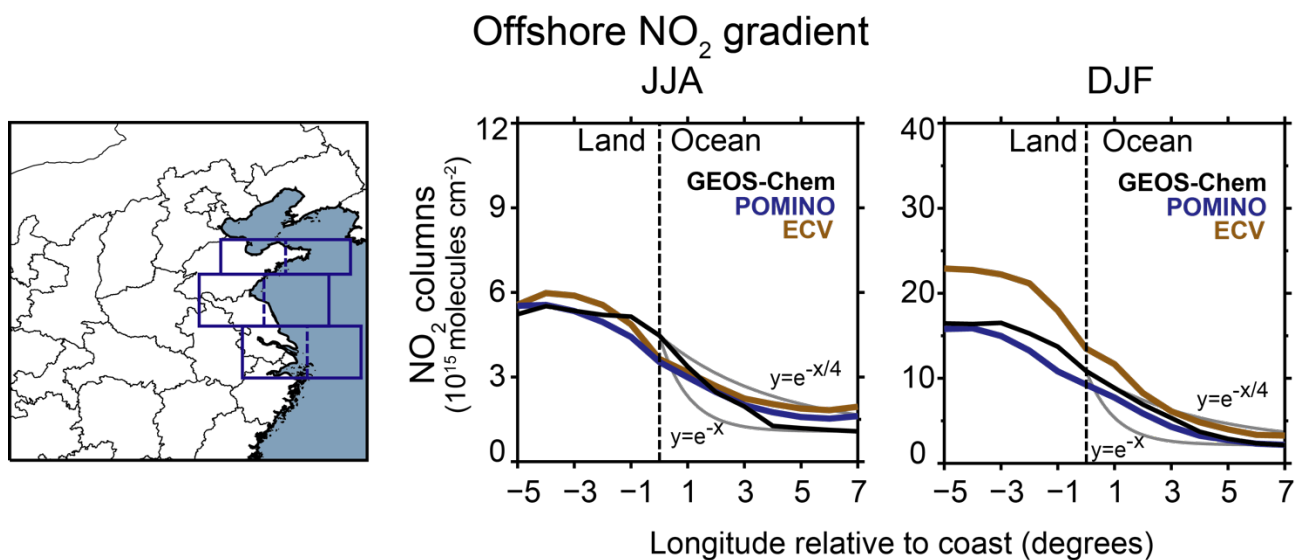

**Figure S3: Offshore gradient of NO<sub>2</sub>.** The right panels show the seasonal-mean longitudinal gradient of OMI and GEOS-Chem columns across China's eastern coast averaged over the latitudinal sections marked in the left panel. The dashed lines indicate approximate land-ocean boundaries. The decay curves corresponding to e-folding lengths of 1° and 4° longitude are also shown.

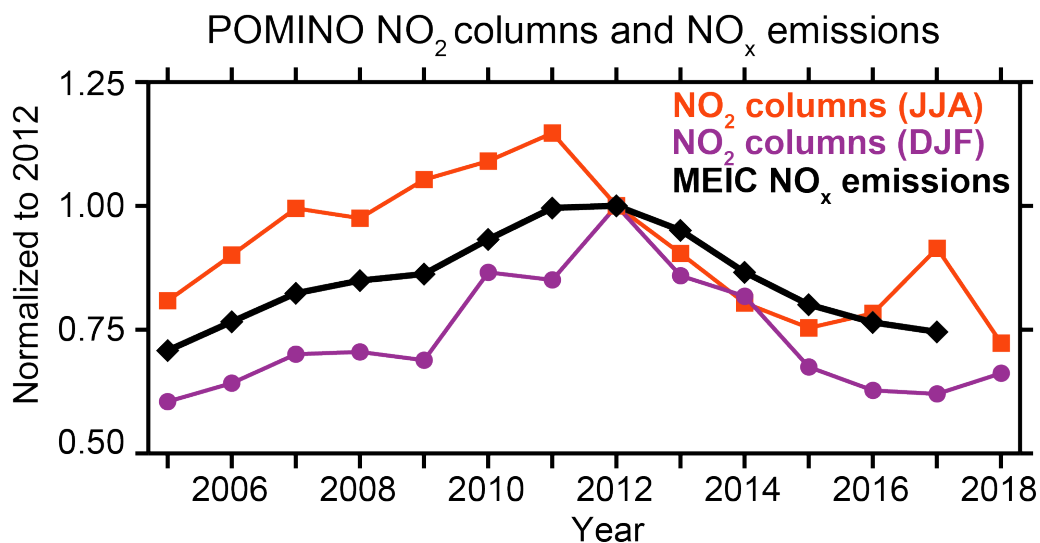

Figure S4: Trends in POMINO NO<sub>2</sub> columns over central-eastern China. The figure shows the trends in the POMINO tropospheric NO<sub>2</sub> columns (Liu et al., 2019) and the MEIC NO<sub>x</sub> emissions (Zheng et al., 2018) over central-eastern China (region delimited in Fig. S1). Values are 3-month means for June, July, and August (JJA) and December, January, and February (DJF) normalized to 2012 (JJA) and 2011/12 (DJF).
